# Supplementary material for: Hole-rich CoP nanosheets with an optimized d-band center for enhancing pH-universal hydrogen evolution electrocatalysis
Source: Royal Society of Chemistry journal article supplement (doi:10.1039/d1ta00044f), 2021-01-01
Supplement: d1ta00044f1.pdf [file d1ta00044f1.pdf]

*Supporting Information*

*for*

**Hole-Rich CoP Nanosheets with Optimized d-band Center for Enhancing pH-Universal Hydrogen Evolution Electrocatalysis**

Shuo Geng<sup>#a</sup>, Fenyang Tian<sup>#a</sup>, Menggang Li<sup>a</sup>, Xin Guo<sup>a</sup>, Yongsheng Yu<sup>a\*</sup>, Weiwei Yang<sup>a\*</sup> and Yanglong Hou<sup>b\*</sup>

<sup>a</sup>MIT Key Laboratory of Critical Materials Technology for New Energy Conversion and Storage, School of Chemistry and Chemical Engineering, Harbin Institute of Technology, Harbin, Heilongjiang 150001, China

<sup>b</sup>College of Engineering, Peking University, Beijing 100871, China

<sup>#</sup> These authors contributed equally.

Corresponding Authors \*E-mail: [ysyu@hit.edu.cn](mailto:ysyu@hit.edu.cn), [yangww@hit.edu.cn](mailto:yangww@hit.edu.cn) and [hou@pku.edu.cn](mailto:houl@pku.edu.cn)

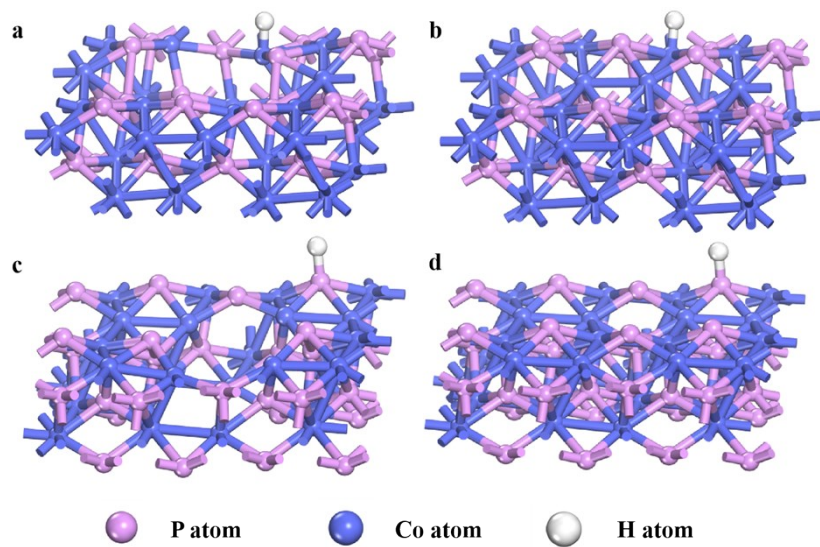

**Fig. S1** The models of H adsorption on CoP (a, c) with holes and (b, d) without holes.

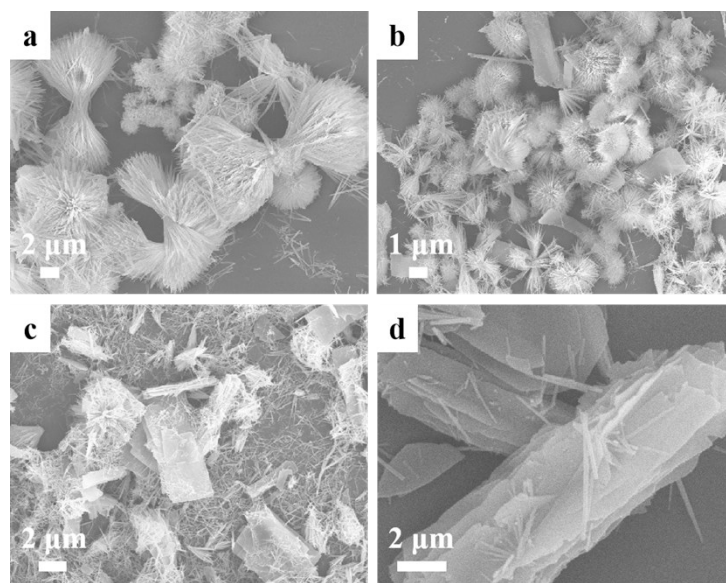

**Fig. S2** The SEM images of the precursor at different reaction stages. (a) 2 h, (b) 4 h, (c) 8 h and (d) 11 h.

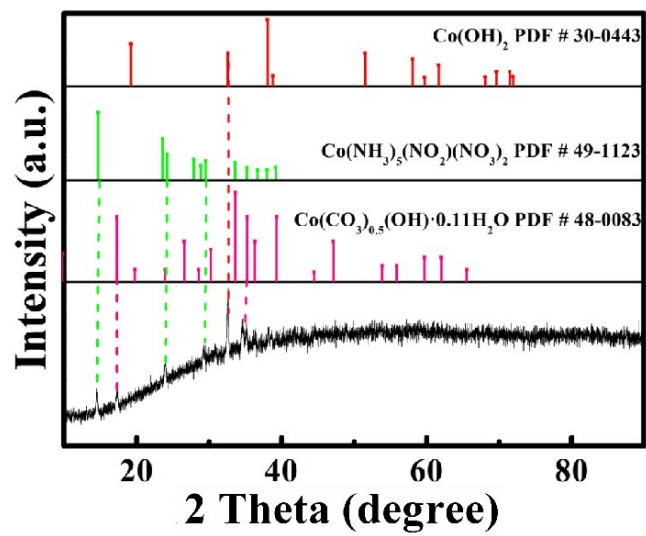

Fig. S3 The XRD pattern of Co-contained precursor.

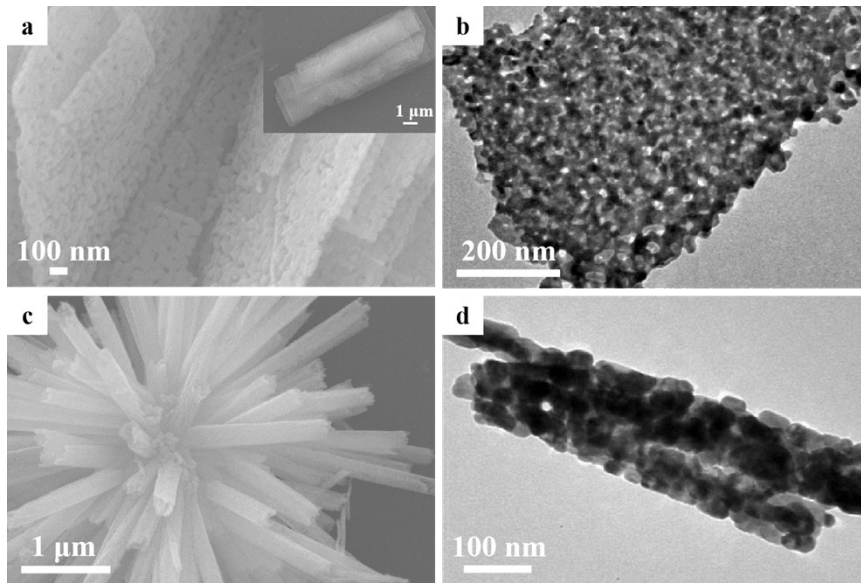

**Fig. S4** The SEM images of  $\text{Co}_3\text{O}_4$  (a) with P123 and without P123 (c). The TEM images of  $\text{Co}_3\text{O}_4$  with P123 (b) and without P123 (d).

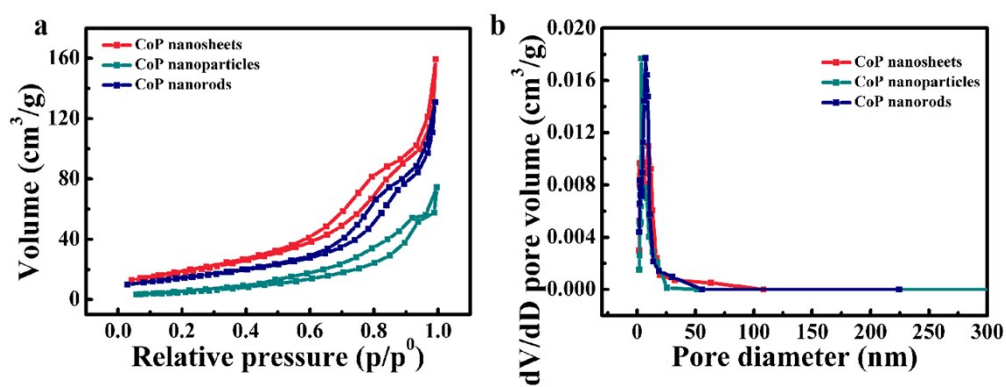

Fig. S5 (a) Nitrogen adsorption/desorption isotherms and (b) BJH pore-size distribution curves of of different CoP electrocatalysts.

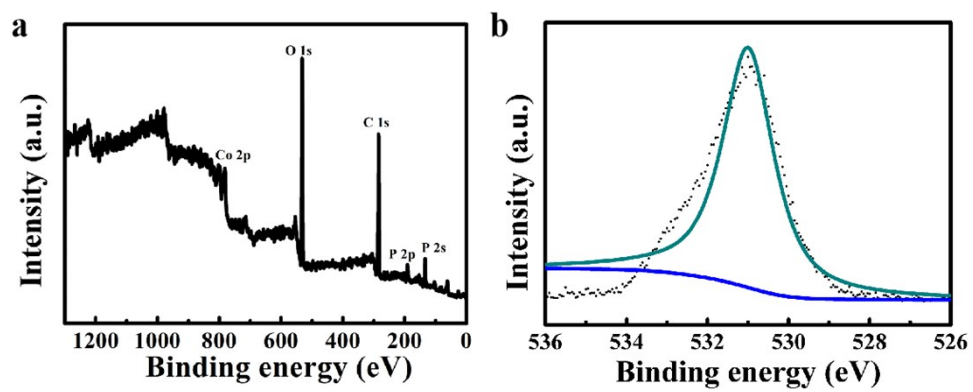

**Fig. S6** The XPS survey scan of hole-rich CoP nanosheets (a) and the high resolution XPS spectra of O 1s in CoP nanosheets (b).

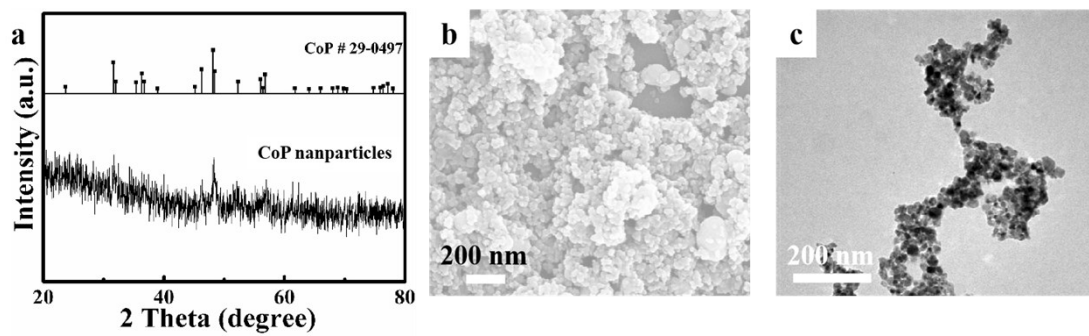

Fig. S7 (a) XRD pattern, (b) SEM image and (c) TEM image of CoP nanoparticles.



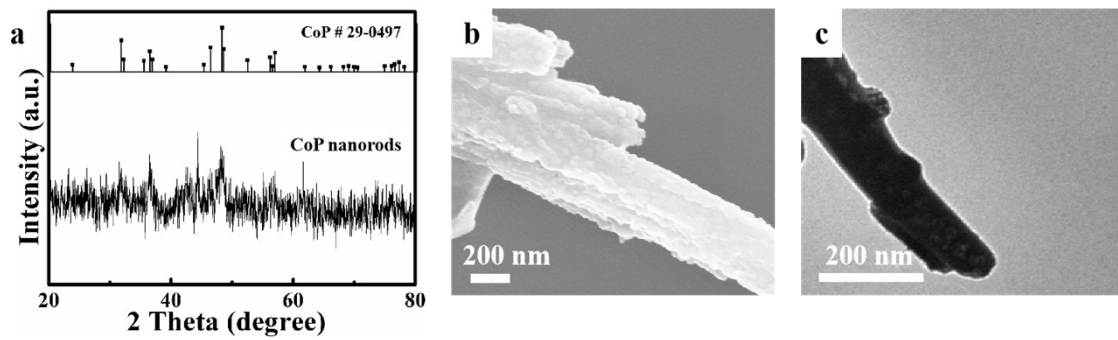

**Fig. S8** (a) XRD pattern, (b) SEM image and (c) TEM image of CoP nanorods.

The XRD pattern of the CoP nanoparticles in Figure S7a and CoP nanorods in Figure S8a show the CoP nanoparticles and CoP nanorods have the same spinel phase with CoP nanosheets (PDF no.29-0497). The SEM images (Figure S7b and S8b) and TEM images (Figure S7c and S8c) show that CoP nanoparticles and CoP nanorods have been successfully synthesized, respectively.

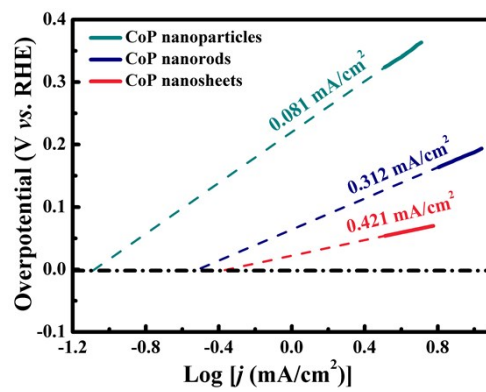

Fig. S9 Calculated exchange current densities of various samples by using extrapolation methods in 0.5 M H<sub>2</sub>SO<sub>4</sub> solution.

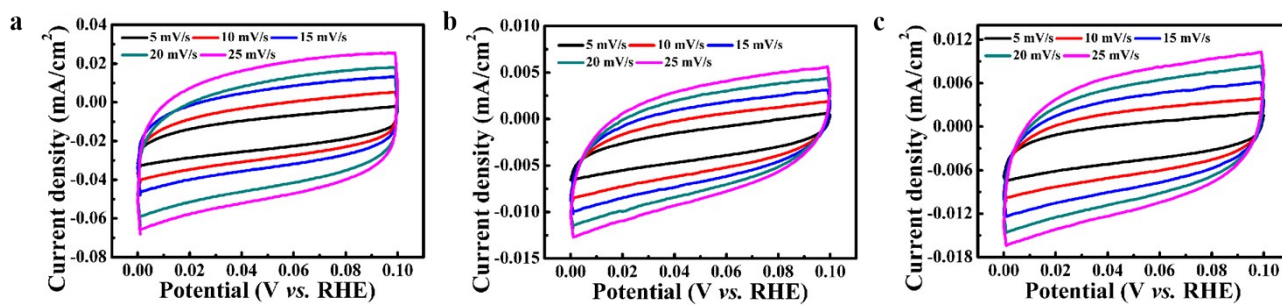

**Fig. S10** Cyclic voltammograms (CV) curves of (a) CoP nanosheets, (b) CoP nanoparticles and (c) CoP nanorods in region of 0-0.1 V vs. RHE with various scan rates in 0.5 M H<sub>2</sub>SO<sub>4</sub> solution.

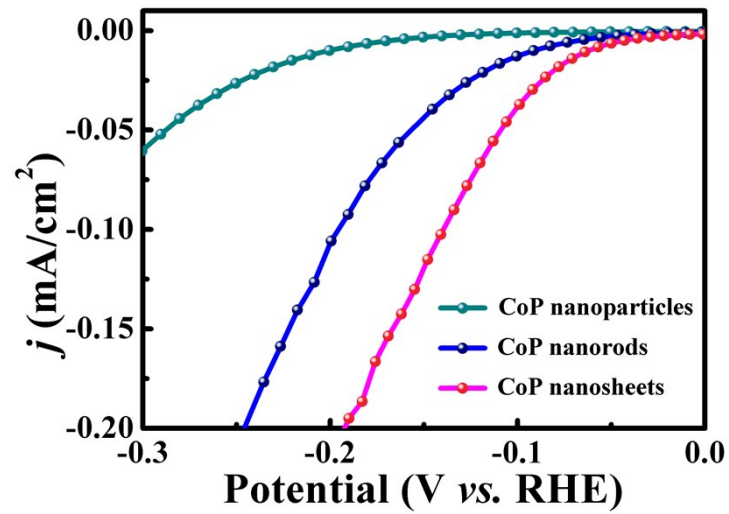

**Fig. S11** The HER polarization curves of CoP nanosheets, CoP nanoparticles and CoP nanorods normalized to the ECSA in 0.5 M  $\text{H}_2\text{SO}_4$  solution.

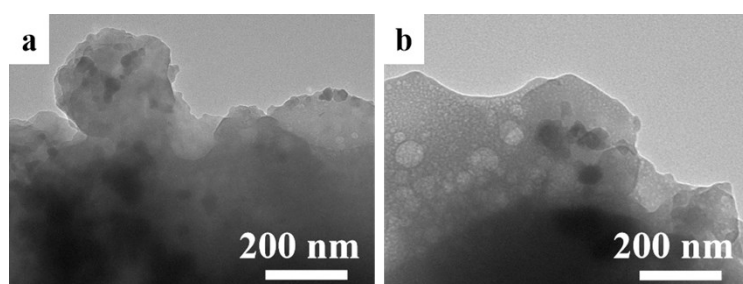

**Fig. S12** The TEM images of CoP nanosheets after long-term stability tests in (a) 0.5 M H<sub>2</sub>SO<sub>4</sub> and (b) 1.0 M KOH.

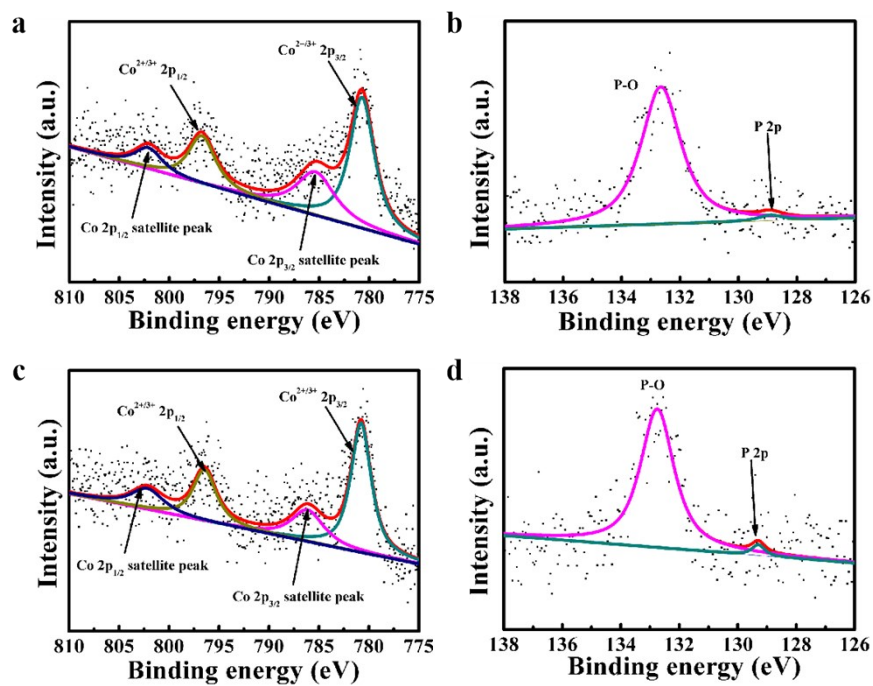

**Fig. S13** The high resolution XPS spectra of (a) Co 2p and (b) P 2p of hole-rich CoP nanosheets after long-term stability tests in 0.5 M H<sub>2</sub>SO<sub>4</sub>. High resolution XPS spectra of (c) Co 2p and (d) P 2p of hole-rich CoP nanosheets after long-term stability tests in 1.0 M KOH.

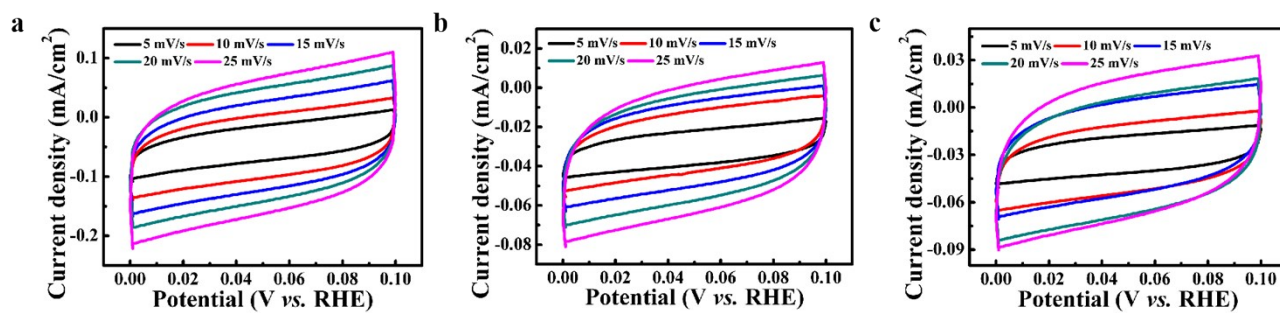

**Fig. S14** Cyclic voltammograms (CV) curves of (a) CoP nanosheets, (b) CoP nanoparticles and (c) CoP nanorods in region of 0-0.1 V vs. RHE at various scan rates in 1.0 M KOH solution.

**Table S1.** Calculated surface energies of hole-rich CoP surfaces.

| CoP                                     | (011)  | (112)  | (211)  | (301)  |
|-----------------------------------------|--------|--------|--------|--------|
| surface energy<br>(meV Å <sup>2</sup> ) | 191.69 | 222.93 | 220.04 | 226.36 |

**Table S2.** Comparison the overpotential at a current density of 10 mA/cm<sup>2</sup> in acidic and alkaline electrolytes.

| Catalysts                | $\eta_{10}$ , acid (mV) | $\eta_{10}$ , alkaline (mV) | References |
|--------------------------|-------------------------|-----------------------------|------------|
| Hole-rich CoP nanosheets | 84                      | 94                          | This work  |
| CoP                      | 113                     | 154                         | 1          |
| CoP@BCN                  | 87                      | 215                         | 2          |
| CoP@NC/rGO               | 123.8                   | NA                          | 3          |
| CoP                      | 160                     | 175                         | 4          |
| CoP/NiCoP                | 125                     | 133                         | 5          |
| Co(OH) <sub>x</sub> @CoP | NA                      | 100                         | 6          |
| Ni-CoP/HPFs              | 144                     | 92                          | 7          |
| Co <sub>2</sub> P        | 95                      | NA                          | 8          |
| CoP                      | 159                     | NA                          | 9          |
| CoP@NC                   | 78                      | 129                         | 10         |
| HNDCM-Co/CoP             | 138                     | 135                         | 11         |
| CoP-NC                   | NA                      | 154                         | 12         |
| Co <sub>2</sub> P        | NA                      | 160                         | 13         |
| CoP/CNT                  | 122                     | NA                          | 14         |
| CoP/CoP <sub>2</sub>     | NA                      | 138                         | 15         |

NA: Not available.

**REFERENCES**

1. H. Li, X. Zhao, H. Liu, S. Chen, X. Yang, C. Lv, H. Zhang, X. She, D. Yang, *Small*, 2018, **14**, 1802824.
2. H. Tabassum, W. Guo, W. Meng, A. Mahmood, R. Zhao, Q. Wang, R. Zou, *Adv. Energy Mater.*, 2017, **7**, 1601671.
3. X. Zhao, D. Luo, Y. Wang, Z. H. Liu, *Nano Res.*, 2019, **12**, 2872-2880.
4. A. Sumboja, T. An, H. Y. Goh, M. Lubke, D. P. Howard, Y. Xu, A. D. Handoko, Y. Zong, Z. Liu, *ACS Appl. Mater. Interfaces*, 2018, **10**, 15673-15680.
5. Y. Lin, K. Sun, S. Liu, X. Chen, Y. Cheng, W. C. Cheong, Z. Chen, L. Zheng, J. Zhang, X. Li, Y. Pan, C. Chen, *Adv. Energy Mater.*, 2019, **9**, 1901213.
6. L. Su, X. Cui, T. He, L. Zeng, H. Tian, Y. Song, K. Qi, B. Y. Xia, *Chem. Sci.*, 2019, **10**, 2019-2024.
7. Y. Pan, K. Sun, Y. Lin, X. Cao, Y. Cheng, S. Liu, L. Zeng, W. C. Cheong, D. Zhao, K. Wu, Z. Liu, Y. Liu, D. Wang, Q. Peng, C. Chen, Y. Li, *Nano Energy*, 2019, **56**, 411-419.
8. J. F. Callejas, C. G. Read, E. J. Popczun, J. M. McEnaney, R. E. Schaak, *Chem. Mater.*, 2015, **27**, 3769-3774.
9. M. Liu, J. Li, *ACS Appl. Mater. Interfaces*, 2016, **8**, 2158-2165.
10. F. Yang, Y. Chen, G. Cheng, S. Chen, W. Luo, *ACS Catal.*, 2017, **7**, 3824-3831.
11. H. Wang, S. Min, Q. Wang, D. Li, G. Casillas, C. Ma, Y. Li, Z. Liu, L. J. Li, J. Yuan, M. Antonietti, T. Wu, *ACS Nano*, 2017, **11**, 4358-4364.



12. B. You, N. Jiang, M. Sheng, S. Gul, J. Yano, Y. Sun, *Chem. Mater.*, 2015, **27**, 7636-7642.
13. K. Xu, H. Ding, M. Zhang, M. Chen, Z. Hao, L. Zhang, C. Wu, Y. Xie, *Adv. Mater.*, 2017, **29**, 1606980.
14. Q. Liu, J. Tian, W. Cui, P. Jiang, N. Cheng, A. M. Asiri, X. Sun, *Angew. Chem. Int. Ed.*, 2014, **53**, 6710-6714.
15. W. Li, S. Zhang, Q. Fan, F. Zhang, S. Xu, *Nanoscale*, 2017, **9**, 5677-5685.
